# Supplementary material for: Optic Neuritis: The Influence of Gene Polymorphisms and Serum Levels of STAT4 (rs10181656, rs7574865, rs7601754, rs10168266)
Source: MDPI journal article supplement (doi:10.3390/jcm13010010), 2023-12-19
Supplement: s1 [file s1]

**Supplementary Materials:** The following supporting information can be downloaded at: [www.mdpi.com/xxx/s1](http://www.mdpi.com/xxx/s1), Table S1: Characteristics; Table S2: Distribution of *STAT4* rs10181656, rs7574865, rs7601754, rs10168266 genotypes in patients with optic neuritis and controls; Table S3: *STAT4* (rs10181656, rs7574865, rs7601754, rs10168266) binary logistic regression analysis of genotypes; Table S4: *STAT4* (rs10181656, rs7574865, rs7601754, rs10168266) distribution of genotypes in patients with optic neuritis and controls according to the age of the subjects; Table S5: Distribution of *STAT4* (rs10181656, rs7574865, rs7601754, rs10168266) genotypes in patients with optic neuritis and controls according to gender; Table S6: Binary logistic regression analysis of *STAT4* (rs10181656, rs7574865, rs7601754, rs10168266) genotypes by age of the subjects; Table S7: Binary logistic regression analysis of *STAT4* (rs10181656, rs7574865, rs7601754, rs10168266) genotypes by gender; Table S8: Binary logistic regression analysis of *STAT4* (rs10181656, rs7574865, rs7601754, rs10168266) genotypes in patients with multiple sclerosis (with MS) and without multiple sclerosis (without MS); Table S9: Haplotype association with the predisposition to optical neuritis with MS occurrence;

**Table S1.** Characteristics.

| Characteristics     | Group           |                       | p-value |
|---------------------|-----------------|-----------------------|---------|
|                     | ON group (n=81) | Control group (n=158) |         |
| Male                | 28 (34.56%)     | 37 (23.41%)           | 0.067   |
| Female              | 53 (65.44%)     | 121 (76.59%)          |         |
| Age median (IQR)    | 33 (16.5)       | 29.5 (14)             | 0.325   |
| Multiple sclerosis: |                 |                       |         |
| -With               | 42 (51.85%)     | -                     | -       |
| -Without            | 32 (39.5%)      |                       |         |
| -NA                 | 7 (8.64%)       |                       |         |

IQR – interquartile range

**Table S2.** Distribution of *STAT4* rs10181656, rs7574865, rs7601754, rs10168266 genotypes in patients with optic neuritis and controls.

| Gene                  | Genotype/Allele   | ON group<br>(n=81)<br>N (%) | Control group<br>(n=158)<br>N (%) | p-value | P-value HWE |
|-----------------------|-------------------|-----------------------------|-----------------------------------|---------|-------------|
| STAT4<br>(rs10181656) | CC                | 50 (61.73)                  | 90 (56.96)                        | 0.621   | 0.950       |
|                       | CG                | 28 (34.57)                  | 58 (36.71)                        |         |             |
|                       | GG                | 3 (3.70)                    | 10 (6.33)                         |         |             |
|                       | In total:         | 81 (100)                    | 158 (100)                         |         |             |
|                       | Allele:<br>C<br>G | 128 (79.01)<br>34 (20.99)   | 238 (75.32)<br>78 (24.68)         | 0.366   |             |
| STAT4<br>(rs7574865)  | GG                | 52 (64.2)                   | 91 (57.6)                         | 0.585   | 0.677       |
|                       | GT                | 25 (30.86)                  | 56 (35.44)                        |         |             |
|                       | TT                | 4 (4.94)                    | 11 (6.96)                         |         |             |
|                       | In total:         | 81 (100)                    | 158 (100)                         |         |             |
|                       | Allele:<br>G<br>T | 129 (79.63)<br>33 (20.37)   | 238 (75.32)<br>78 (24.68)         | 0.751   |             |
| STAT4<br>(rs7601754)  | AA                | 59 (72.84)                  | 121 (76.58)                       | 0.810   | 0.736       |
|                       | GA                | 20 (24.69)                  | 34 (21.52)                        |         |             |
|                       | GG                | 2 (2.47)                    | 3 (1.9)                           |         |             |
|                       | In total:         | 81 (100)                    | 157 (100)                         |         |             |

|                              |                   |                           |                           |       |       |
|------------------------------|-------------------|---------------------------|---------------------------|-------|-------|
|                              | Allele:<br>A<br>G | 138 (85.19)<br>24 (14.81) | 276 (87.34)<br>40 (12.66) | 0.511 |       |
| <b>STAT4</b><br>(rs10168266) | CC                | 57 (70.37)                | 105 (66.46)               | 0.655 | 0.539 |
|                              | CT                | 21 (25.93)                | 49 (31.01)                |       |       |
|                              | TT                | 3 (3.70)                  | 4 (2.53)                  |       |       |
|                              | In total:         | 81 (100)                  | 158 (100)                 |       |       |
|                              | Allele:<br>C<br>T | 135 (83.33)<br>27 (16.67) | 259 (81.96)<br>57 (18.04) | 0.709 |       |

p-value – level of significance; p-value HWE - significance level according to the Hardy-Weinberg equilibrium, differences were considered statistically significant when  $p < 0.05$ .

**Table S3.** *STAT4* (rs10181656, rs7574865, rs7601754, rs10168266) binary logistic regression analysis of genotypes.

| <b>STAT4 (rs10181656):</b> |                 |                      |         |         |
|----------------------------|-----------------|----------------------|---------|---------|
| Model                      | Genotype/Allele | OR (95% CI)          | p-value | AIC     |
| Codominant                 | CG vs. CC       | 0.869 (0.492-1.534)  | 0.628   | 309.070 |
|                            | GG vs. CC       | 0.540 (0.142-2.054)  | 0.366   |         |
| Dominant                   | CG+GG vs. CC    | 0.821 (0.474-1.419)  | 0.479   | 307.565 |
| Recessive                  | GG vs. CC+CG    | 0.569 (0.152-2.129)  | 0.402   | 307.306 |
| Overdominant               | CG vs. CC+GG    | 0.911 (0.52-1.562)   | 0.744   | 307.962 |
| Additive                   | C               | 0.810 (0.512-1.28)   | 0.367   | 307.240 |
| <b>STAT4 (rs7574865):</b>  |                 |                      |         |         |
| Model                      | Genotype/Allele | OR (95% CI)          | p-value | AIC     |
| Codominant                 | GT vs. GG       | 0.781 (0.437-1.398)  | 0.406   | 308.983 |
|                            | TT vs. GG       | 0.638 (0.193-2.1)    | 0.458   |         |
| Dominant                   | GT+TT vs. GG    | 0.757 (0.436-1.317)  | 0.325   | 307.091 |
| Recessive                  | TT vs. GG+GT    | 0.694 (0.214-2.253)  | 0.543   | 307.682 |
| Overdominant               | GT vs. GG+TT    | 0.813 (0.458-1.442)  | 0.479   | 307.564 |
| Additive                   | G               | 0.789 (0.503-1.239)  | 0.303   | 306.984 |
| <b>STAT4 (rs7601754):</b>  |                 |                      |         |         |
| Model                      | Genotype/Allele | OR (95% CI)          | p-value | AIC     |
| Codominant                 | GA vs. AA       | 1.206 (0.64-2.274)   | 0.562   | 309.652 |
|                            | GG vs. AA       | 1.367 (0.222-8.405)  | 0.736   |         |
| Dominant                   | GA+GG vs. AA    | 1.219 (0.661-2.25)   | 0.526   | 308.669 |
| Recessive                  | GG vs. AA+GA    | 1.308 (0.214-7.989)  | 0.771   | 307.986 |
| Overdominant               | GA vs. AA+GG    | 1.196 (0.636-2.249)  | 0.579   | 307.764 |
| Additive                   | A               | 1.195 (0.697-2.049)  | 0.518   | 307.656 |
| <b>STAT4 (rs10168266)</b>  |                 |                      |         |         |
| Model                      | Genotype/Allele | OR (95% CI)          | p-value | AIC     |
| Codominant                 | CT vs. CC       | 0.789 (0.431-1.445)  | 0.443   | 309.223 |
|                            | TT vs. CC       | 1.382 (0.299-6.389)  | 0.679   |         |
| Dominant                   | CT+TT vs. CC    | 0.834 (0.467-1.49)   | 0.540   | 307.690 |
| Recessive                  | TT vs. CC+CT    | 1.481 (0.323- 6.781) | 0.613   | 307.819 |
| Overdominant               | CT vs. CC+CT    | 0.779 (0.427-1.419)  | 0.414   | 307.392 |
| Additive                   | C               | 0.908 (0.547-1.506)  | 0.708   | 307.927 |

p-value – level of significance; differences were considered statistically significant when  $p < 0.05$ , OR – capability ratio; AIC – Akaike.

**Table S4.** *STAT4* (rs10181656, rs7574865, rs7601754, rs10168266) distribution of genotypes in patients with optic neuritis and controls according to the age of the subjects.

| Gene                                 | Genotype | ≤ 30 y.                 |                               | P-value | >30 y.                   |                               | P-value |
|--------------------------------------|----------|-------------------------|-------------------------------|---------|--------------------------|-------------------------------|---------|
|                                      |          | ON group(n=38)<br>N (%) | Control group (n=88)<br>N (%) |         | ON group (n=43)<br>N (%) | Control group (n=70)<br>N (%) |         |
| <b><i>STAT4</i><br/>(rs10181656)</b> | CC       | 24 (63.16)              | 46 (52.27)                    | 0.425   | 26 (60.47)               | 44 (62.86)                    | 0.915   |
|                                      | CG       | 13 (34.2)               | 36 (40.91)                    |         | 15 (34.88)               | 22 (31.43)                    |         |
|                                      | GG       | 1 (2.63)                | 6 (6.82)                      |         | 2 (4.65)                 | 4 (5.71)                      |         |
|                                      | Allele:  |                         |                               | 0.205   |                          |                               | 0.906   |
|                                      | C        | 61 (80.26)              | 128 (72.73)                   |         | 67 (77.91)               | 110 (78.57)                   |         |
| <b><i>STAT4</i><br/>(rs7574865)</b>  | G        | 15 (19.74)              | 48 (27.27)                    | 0.432   | 19 (22.09)               | 30 (21.43)                    | 0.967   |
|                                      | GG       | 25 (65.79)              | 47 (53.41)                    |         | 27 (62.79)               | 44 (62.86)                    |         |
|                                      | GT       | 11 (28.95)              | 34 (38.64)                    |         | 14 (32.56)               | 22 (31.43)                    |         |
|                                      | TT       | 2 (5.26)                | 7 (7.95)                      | 0.205   | 2 (4.65)                 | 4 (5.71)                      | 0.929   |
|                                      | Allele:  |                         |                               |         |                          |                               |         |
| <b><i>STAT4</i><br/>(rs7601754)</b>  | G        | 61 (80.26)              | 128 (72.73)                   | 0.564   | 68 (79.07)               | 110 (78.57)                   | 0.929   |
|                                      | T        | 15 (19.74)              | 48 (27.27)                    |         | 18 (20.93)               | 30 (21.43)                    |         |
|                                      | AA       | 25 (65.79)              | 66 (75.0)                     |         | 34 (79.07)               | 55 (78.57)                    | 0.964   |
|                                      | GA       | 12 (31.58)              | 20 (22.73)                    | 0.330   | 8 (18.60)                | 14 (20.0)                     |         |
|                                      | GG       | 1 (2.63)                | 2 (2.27)                      |         | 1 (2.33)                 | 1 (1.43)                      |         |
| <b><i>STAT4</i><br/>(rs10168266)</b> | Allele:  |                         |                               | 0.328   |                          |                               | 0.873   |
|                                      | A        | 62 (81.58)              | 152 (86.36)                   |         | 76 (88.37)               | 124 (88.57)                   |         |
|                                      | G        | 14 (18.42)              | 24 (13.64)                    |         | 10 (11.63)               | 16 (11.43)                    | 0.626   |
|                                      | CC       | 28 (73.68)              | 55 (62.5)                     | 0.387   | 29 (67.44)               | 50 (71.43)                    |         |
|                                      | CT       | 8 (21.05)               | 30 (34.09)                    |         | 13 (30.23)               | 19 (27.14)                    |         |
| <b><i>STAT4</i><br/>(rs10168266)</b> | TT       | 2 (5.26)                | 3 (3.41)                      | 0.329   | 1 (2.33)                 | 1 (1.43)                      | 0.747   |
|                                      | Allele:  |                         |                               |         |                          |                               |         |
|                                      | C        | 64 (84.2)               | 140 (79.55)                   |         | 71 (82.56)               | 119 (85.0)                    |         |
|                                      | T        | 12 (15.79)              | 36 (20.45)                    |         | 15 (17.44)               | 21 (15.0)                     |         |

p-value – level of significance; differences were considered statistically significant when  $p < 0.05$ .

**Table S5.** Distribution of *STAT4* (rs10181656, rs7574865, rs7601754, rs10168266) genotypes in patients with optic neuritis and controls according to gender.

| Gene                                 | Genotype | Males                    |                               |         | Females                  |                                |         |
|--------------------------------------|----------|--------------------------|-------------------------------|---------|--------------------------|--------------------------------|---------|
|                                      |          | ON group (n=28)<br>N (%) | Control group (n=37)<br>N (%) | P-value | ON group (n=53)<br>N (%) | Control group (n=121)<br>N (%) | P-value |
| <b><i>STAT4</i><br/>(rs10181656)</b> | CC       | 20 (71.43)               | 23 (62.16)                    | 0.647   | 30 (56.60)               | 67 (55.37)                     | 0.858   |
|                                      | CG       | 7 (25)                   | 11 (29.73)                    |         | 21 (39.62)               | 47 (38.84)                     |         |
|                                      | GG       | 1 (3.57)                 | 3 (8.11)                      |         | 2 (3.77)                 | 7 (5.79)                       |         |
|                                      | Allele:  |                          |                               | 0.329   |                          |                                | 0.747   |

|                               |              |            |            |       |            |             |       |
|-------------------------------|--------------|------------|------------|-------|------------|-------------|-------|
|                               | C            | 47 (83.93) | 57 (77.03) |       | 81 (76.42) | 181 (74.79) |       |
|                               | G            | 9 (16.07)  | 17 (22.97) |       | 25 (23.58) | 61 (25.21)  |       |
| <b>STAT4<br/>(rs7574865)</b>  | GG           | 20 (71.43) | 25 (67.57) | 0.945 | 32 (60.38) | 66 (54.55)  | 0.661 |
|                               | GT           | 6 (21.43)  | 9 (24.32)  |       | 19 (35.85) | 47 (38.84)  |       |
|                               | TT           | 2 (7.14)   | 3 (8.11)   |       | 2 (3.77)   | 8 (6.61)    |       |
|                               | Allele:<br>G | 46 (82.14) | 59 (79.73) | 0.729 | 83 (78.30) | 179 (73.97) | 0.388 |
|                               | T            | 10 (17.86) | 15 (20.27) |       | 23 (21.7)  | 63 (26.03)  |       |
| <b>STAT4<br/>(rs7601754)</b>  | AA           | 19 (67.86) | 29 (78.38) | 0.475 | 40 (75.47) | 92 (76.03)  | 0.832 |
|                               | GA           | 8 (28.57)  | 6 (16.22)  |       | 12 (22.64) | 28 (23.14)  |       |
|                               | GG           | 1 (3.57)   | 2 (5.41)   |       | 1 (1.89)   | 1 (0.83)    |       |
|                               | Allele:<br>A | 46 (82.14) | 64 (86.49) | 0.496 | 92 (86.8)  | 212 (87.6)  | 0.833 |
|                               | G            | 10 (17.86) | 10 (13.51) |       | 14 (13.21) | 30 (12.4)   |       |
| <b>STAT4<br/>(rs10168266)</b> | CC           | 21 (75)    | 27 (72.97) | 0.606 | 36 (67.92) | 78 (64.46)  | 0.896 |
|                               | CT           | 5 (17.86)  | 9 (24.32)  |       | 16 (30.2)  | 40 (33.06)  |       |
|                               | TT           | 2 (7.14)   | 1 (2.70)   |       | 1 (1.89)   | 3 (2.48)    |       |
|                               | Allele:<br>C | 47 (83.93) | 63 (85.14) | 0.849 | 88 (83.02) | 196 (80.99) | 0.653 |
|                               | T            | 9 (16.07)  | 11 (14.86) |       | 18 (16.98) | 46 (19.01)  |       |

p-value - level of significance; differences were considered statistically significant when  $p < 0.05$ .

**Table S6.** Binary logistic regression analysis of *STAT4* (rs10181656, rs7574865, rs7601754, rs10168266) genotypes by age of the subjects.

| <b>Age ≤30 years old</b>   |                        |                      |                |            |
|----------------------------|------------------------|----------------------|----------------|------------|
| <b>STAT4 (rs10181656):</b> |                        |                      |                |            |
| <b>Model</b>               | <b>Genotype/Allele</b> | <b>OR (95% CI)</b>   | <b>p-value</b> | <b>AIC</b> |
| Codominant                 | CG vs. CC              | 0.841 (0.409-1.73)   | 0.638          | 189.610    |
|                            | GG vs. CC              | 0.491 (0.097-2.473)  | 0.388          |            |
| Dominant                   | CG+GG vs. CC           | 0.785 (0.392-1.574)  | 0.496          | 188.056    |
| Recessive                  | GG vs. CC+CG           | 0.528 (0.108-2.587)  | 0.431          | 187.832    |
| Overdominant               | CG vs. CC+GG           | 0.901 (0.444-1.829)  | 0.774          | 188.440    |
| Additive                   | C                      | 0.775 (0.436-1.376)  | 0.384          | 187.748    |
| <b>STAT4 (rs7574865):</b>  |                        |                      |                |            |
| <b>Model</b>               | <b>Genotype/Allele</b> | <b>OR (95% CI)</b>   | <b>p-value</b> | <b>AIC</b> |
| Codominant                 | GT vs. GG              | 0.888 (0.427-1.847)  | 0.750          | 190.168    |
|                            | TT vs. GG              | 0.679 (0.17-2.714)   | 0.679          |            |
| Dominant                   | GT+TT vs. GG           | 0.849 (0.423-1.702)  | 0.644          | 188.309    |
| Recessive                  | TT vs. GG+GT           | 0.712 (0.184-2.76)   | 0.623          | 188.270    |
| Overdominant               | GT vs. GG+TT           | 0.930 (0.454-1.903)  | 0.842          | 188.483    |
| Additive                   | G                      | 0.853 (0.492-1.477)  | 0.570          | 188.195    |
| <b>STAT4 (rs7601754):</b>  |                        |                      |                |            |
| <b>Model</b>               | <b>Genotype/Allele</b> | <b>OR (95% CI)</b>   | <b>p-value</b> | <b>AIC</b> |
| Codominant                 | GA vs. AA              | 1.501 (0.673-3.364)  | 0.321          | 189.549    |
|                            | GG vs. AA              | 1.212 (0.106-13.830) | 0.877          |            |
| Dominant                   | GA+GG vs. AA           | 1.476 (0.678-3.214)  | 0.327          | 187.577    |

|                             |                        |                      |                |            |
|-----------------------------|------------------------|----------------------|----------------|------------|
| Recessive                   | GG vs. AA+GA           | 1.098 (0.097-12.416) | 0.940          | 188.517    |
| Overdominant                | GA vs. AA+GG           | 1.493 (0.672-3.319)  | 0.325          | 187.572    |
| Additive                    | A                      | 1.367 (0.687-2.722)  | 0.373          | 187.743    |
| <b>STAT4 (rs10168266):</b>  |                        |                      |                |            |
| <b>Model</b>                | <b>Genotype/Allele</b> | <b>OR (95% CI)</b>   | <b>p-value</b> | <b>AIC</b> |
| Codominant                  | CT vs. CC              | 0.754 (0.351-1.62)   | 0.470          | 189.819    |
|                             | TT vs. CC              | 1.354 (0.215-8.514)  | 0.747          |            |
| Dominant                    | CT+TT vs. CC           | 0.802 (0.385-1.668)  | 0.554          | 188.169    |
| Recessive                   | TT vs. CC+CT           | 1.481 (0.239-9.175)  | 0.673          | 188.349    |
| Overdominant                | CT vs. CC+CT           | 0.743 (0.348-1.585)  | 0.442          | 187.921    |
| Additive                    | C                      | 0.886 (0.469-1.672)  | 0.708          | 188.381    |
| <b>Age &gt;30 years old</b> |                        |                      |                |            |
| <b>STAT4 (rs10181656):</b>  |                        |                      |                |            |
| <b>Model</b>                | <b>Genotype/Allele</b> | <b>OR (95% CI)</b>   | <b>p-value</b> | <b>AIC</b> |
| Codominant                  | CG vs. CC              | 1.005 (0.39-2.59)    | 0.991          | 122.346    |
|                             | GG vs. CC              | 0.804 (0.069-9.379)  | 0.862          |            |
| Dominant                    | CG+GG vs. CC           | 0.983 (0.395-2.45)   | 0.971          | 120.377    |
| Recessive                   | GG vs. CC+CG           | 0.803 (0.07-9.208)   | 0.860          | 120.346    |
| Overdominant                | CG vs. CC+GG           | 1.016 (0.397-2.599)  | 0.974          | 120.377    |
| Additive                    | C                      | 0.965 (0.44-2.117)   | 0.928          | 120.370    |
| <b>STAT4 (rs7574865):</b>   |                        |                      |                |            |
| <b>Model</b>                | <b>Genotype/Allele</b> | <b>OR (95% CI)</b>   | <b>p-value</b> | <b>AIC</b> |
| Codominant                  | GT vs. GG              | 0.678 (0.254-1.811)  | 0.438          | 121.732    |
|                             | TT vs. GG              | 0.720 (0.062-8.378)  | 0.793          |            |
| Dominant                    | GT+TT vs. GG           | 0.682 (0.266-1.752)  | 0.427          | 119.734    |
| Recessive                   | TT vs. GG+GT           | 0.803 (0.7-9.208)    | 0.860          | 120.364    |
| Overdominant                | GT vs. GG+TT           | 0.688 (0.259-1.828)  | 0.453          | 119.803    |
| Additive                    | G                      | 0.735 (0.325-1.664)  | 0.461          | 119.818    |
| <b>STAT4 (rs7601754):</b>   |                        |                      |                |            |
| <b>Model</b>                | <b>Genotype/Allele</b> | <b>OR (95% CI)</b>   | <b>p-value</b> | <b>AIC</b> |
| Codominant                  | GA vs. AA              | 0.849 (0.3-2.407)    | 0.758          | 122.165    |
|                             | GG vs. AA              | 1.577 (0.94-26.324)  | 0.751          |            |
| Dominant                    | GA+GG vs. AA           | 0.901 (0.332-2.445)  | 0.838          | 120.336    |
| Recessive                   | GG vs. AA+GA           | 1.636 (0.099-27.056) | 0.731          | 120.261    |
| Overdominant                | GA vs. AA+GG           | 0.838 (0.297-2.366)  | 0.738          | 120.265    |
| Additive                    | A                      | 0.967 (0.404-2.314)  | 0.940          | 120.373    |
| <b>STAT4 (rs10168266):</b>  |                        |                      |                |            |
| <b>Model</b>                | <b>Genotype/Allele</b> | <b>OR (95% CI)</b>   | <b>p-value</b> | <b>AIC</b> |
| Codominant                  | CT vs. CC              | 0.914 (0.336-2.491)  | 0.744          | 122.230    |
|                             | TT vs. CC              | 1.600 (0.096-26.749) |                |            |
| Dominant                    | CT+TT vs. CC           | 0.960 (0.365-2.522)  | 0.934          | 120.371    |
| Recessive                   | TT vs. CC+CT           | 1.636 (0.99-27.056)  | 0.731          | 120.261    |
| Overdominant                | CT vs. CC+CT           | 0.901 (0.332-2.445)  | 0.838          | 120.336    |
| Additive                    | C                      | 1.013 (0.432-2.373)  | 0.977          | 120.377    |

p-value – level of significance; differences were considered as statistically significant when  $p < 0.05$ , OR – capability ratio; AIC – Akaike.

**Table S7.** Binary logistic regression analysis of *STAT4* (rs10181656, rs7574865,

rs7601754, rs10168266) genotypes by gender.

| Males                      |                 |                      |         |         |
|----------------------------|-----------------|----------------------|---------|---------|
| <i>STAT4</i> (rs10181656): |                 |                      |         |         |
| Model                      | Genotype/Allele | OR (95% CI)          | p-value | AIC     |
| Codominant                 | CG vs. CC       | 0.732 (0.238-2.246)  | 0.585   | 91.957  |
|                            | GG vs. CC       | 0.383 (0.037-3.984)  | 0.422   |         |
| Dominant                   | CG+GG vs. CC    | 0.657 (0.229-1.888)  | 0.436   | 90.242  |
| Recessive                  | GG vs. CC+CG    | 0.420 (0.041-4.266)  | 0.463   | 90.258  |
| Overdominant               | CG vs. CC+GG    | 0.788 (0.26-2.387)   | 0.673   | 90.680  |
| Additive                   | C               | 0.674 (0.288-1.579)  | 0.364   | 90.005  |
| <i>STAT4</i> (rs7574865):  |                 |                      |         |         |
| Model                      | Genotype/Allele | OR (95% CI)          | p-value | AIC     |
| Codominant                 | GT vs. GG       | 0.833 (0.254-2.735)  | 0.764   | 92.747  |
|                            | TT vs. GG       | 0.833 (0.127-5.479)  | 0.850   |         |
| Dominant                   | GT+TT vs. GG    | 0.833 (0.286-2.431)  | 0.739   | 90.747  |
| Recessive                  | TT vs. GG+GT    | 0.872 (0.136-5.604)  | 0.885   | 90.836  |
| Overdominant               | GT vs. GG+TT    | 0.848 (0.262-2.745)  | 0.784   | 90.783  |
| Additive                   | G               | 0.883 (0.399-1.952)  | 0.758   | 90.763  |
| <i>STAT4</i> (rs7601754):  |                 |                      |         |         |
| Model                      | Genotype/Allele | OR (95% CI)          | p-value | AIC     |
| Codominant                 | GA vs. AA       | 2.035 (0.609-6.799)  | 0.248   | 91.384  |
|                            | GG vs. AA       | 0.763 (0.065-9.015)  | 0.830   |         |
| Dominant                   | GA+GG vs. AA    | 1.717 (0.513-5.233)  | 0.342   | 89.952  |
| Recessive                  | GG vs. AA+GA    | 0.648 (0.056-7.529)  | 0.729   | 90.734  |
| Overdominant               | GA vs. AA+GG    | 2.067 (0.623-6.851)  | 0.235   | 89.431  |
| Additive                   | A               | 1.326 (0.547-3.215)  | 0.532   | 90.468  |
| <i>STAT4</i> (rs10168266): |                 |                      |         |         |
| Model                      | Genotype/Allele | OR (95% CI)          | p-value | AIC     |
| Codominant                 | CT vs. CC       | 0.714 (0.208-2.451)  | 0.593   | 91.858  |
|                            | TT vs. CC       | 2.571 (0.218-30.318) | 0.453   |         |
| Dominant                   | CT+TT vs. CC    | 0.9 (0.293-2.763)    | 0.854   | 90.825  |
| Recessive                  | TT vs. CC+CT    | 2.769 (0.238-32.184) | 0.416   | 90.149  |
| Overdominant               | CT vs. CC+CT    | 0.676 (0.199-2.301)  | 0.531   | 90.459  |
| Additive                   | C               | 1.082 (0.446-2.622)  | 0.862   | 90.829  |
| Females                    |                 |                      |         |         |
| <i>STAT4</i> (rs10181656): |                 |                      |         |         |
| Model                      | Genotype/Allele | OR (95% CI)          | p-value | AIC     |
| Codominant                 | CG vs. CC       | 0.998 (0.51-1.952)   | 0.995   | 217.597 |
|                            | GG vs. CC       | 0.638 (0.125-3.255)  | 0.589   |         |
| Dominant                   | CG+GG vs. CC    | 0.951 (0.469-1.824)  | 0.880   | 215.896 |
| Recessive                  | GG vs. CC+CG    | 0.639 (0.128-3.182)  | 0.584   | 215.597 |
| Overdominant               | CG vs. CC+GG    | 1.033 (0.534-2.001)  | 0.923   | 215.910 |
| Additive                   | C               | 0.912 (0.527-1.577)  | 0.741   | 215.809 |
| <i>STAT4</i> (rs7574865):  |                 |                      |         |         |
| Model                      | Genotype/Allele | OR (95% CI)          | p-value | AIC     |
| Codominant                 | GT vs. GG       | 0.834 (0.422-1.645)  | 0.600   | 217.052 |
|                            | TT vs. GG       | 0.516 (0.103-2.569)  | 0.419   |         |
| Dominant                   | GT+TT vs. GG    | 0.788 (0.408-1.518)  | 0.476   | 215.407 |

|                            |                        |                      |                |            |
|----------------------------|------------------------|----------------------|----------------|------------|
| Recessive                  | TT vs. GG+GT           | 0.554 (0.114-2.701)  | 0.465          | 215.328    |
| Overdominant               | GT vs. GG+TT           | 0.880 (0.45-1.719)   | 0.708          | 215.778    |
| Additive                   | G                      | 0.783 (0.452-1.358)  | 0.385          | 215.146    |
| <b>STAT4 (rs7601754):</b>  |                        |                      |                |            |
| <b>Model</b>               | <b>Genotype/Allele</b> | <b>OR (95% CI)</b>   | <b>p-value</b> | <b>AIC</b> |
| Codominant                 | GA vs. AA              | 0.986 (0.456-2.132)  | 0.971          | 217.582    |
|                            | GG vs. AA              | 2.300 (0.14-37.693)  | 0.559          |            |
| Dominant                   | GA+GG vs. AA           | 1.031 (0.486-2.187)  | 0.937          | 215.913    |
| Recessive                  | GG vs. AA+GA           | 2.308 (0.142-37.603) | 0.557          | 215.583    |
| Overdominant               | GA vs. AA+GG           | 0.972 (0.45-2.099)   | 0.943          | 215.914    |
| Additive                   | A                      | 1.079 (0.539-2.161)  | 0.831          | 215.874    |
| <b>STAT4 (rs10168266):</b> |                        |                      |                |            |
| <b>Model</b>               | <b>Genotype/Allele</b> | <b>OR (95% CI)</b>   | <b>p-value</b> | <b>AIC</b> |
| Codominant                 | CT vs. CC              | 0.876 (0.43-1.748)   | 0.689          | 217.698    |
|                            | TT vs. CC              | 0.722 (0.073-7.185)  | 0.781          |            |
| Dominant                   | CT+TT vs. CC           | 0.857 (0.431-1.702)  | 0.659          | 215.722    |
| Recessive                  | TT vs. CC+CT           | 0.756 (0.077-7.444)  | 0.811          | 215.859    |
| Overdominant               | CT vs. CC+CT           | 0.876 (0.436-1.76)   | 0.709          | 215.779    |
| Additive                   | C                      | 0.862 (0.463-1.607)  | 0.641          | 215.699    |

p-value – level of significance; differences were considered as statistically significant when  $p < 0.05$ , OR – capability ratio; AIC – Akaike.

**Table S8.** Binary logistic regression analysis of *STAT4* (rs10181656, rs7574865, rs7601754, rs10168266) genotypes in patients with multiple sclerosis (with MS) and without multiple sclerosis (without MS).

| <b>With MS</b>             |                        |                      |                |            |
|----------------------------|------------------------|----------------------|----------------|------------|
| <b>STAT4 (rs10181656):</b> |                        |                      |                |            |
| <b>Model</b>               | <b>Genotype/Allele</b> | <b>OR (95% CI)</b>   | <b>p-value</b> | <b>AIC</b> |
| Codominant                 | CG vs. CC              | 0.853 (0.381-1.911)  | 0.700          | 175.554    |
|                            | GG vs. CC              | 0.450 (0.054-3.719)  | 0.459          |            |
| Dominant                   | CG+GG vs. CC           | 0.794 (0.363-1.736)  | 0.563          | 173.944    |
| Recessive                  | GG vs. CC+CG           | 0.477 (0.059-3.867)  | 0.488          | 173.704    |
| Overdominant               | CG vs. CC+GG           | 0.903 (0.407-2.006)  | 0.802          | 174.219    |
| Additive                   | C                      | 0.778 (0.402-1.507)  | 0.457          | 173.708    |
| <b>STAT4 (rs7574865):</b>  |                        |                      |                |            |
| <b>Model</b>               | <b>Genotype/Allele</b> | <b>OR (95% CI)</b>   | <b>p-value</b> | <b>AIC</b> |
| Codominant                 | GT vs. GG              | 0.565 (0.237-1.35)   | 0.199          | 173.755    |
|                            | TT vs. GG              | 0.360 (0.044-2.93)   | 0.339          |            |
| Dominant                   | GT+TT vs. GG           | 0.531 (0.231-1.222)  | 0.137          | 171.937    |
| Recessive                  | TT vs. GG+GT           | 0.431 (0.054-3.463)  | 0.429          | 173.505    |
| Overdominant               | GT vs. GG+TT           | 0.607 (0.256-1.441)  | 0.258          | 172.929    |
| Additive                   | G                      | 0.578 (0.284-1.179)  | 0.132          | 171.769    |
| <b>STAT4 (rs7601754):</b>  |                        |                      |                |            |
| <b>Model</b>               | <b>Genotype/Allele</b> | <b>OR (95% CI)</b>   | <b>p-value</b> | <b>AIC</b> |
| Codominant                 | GA vs. AA              | 1.456 (0.614-3.454)  | 0.394          | 175.406    |
|                            | GG vs. AA              | 1.833 (0.182-18.493) | 0.607          |            |
| Dominant                   | GA+GG vs. AA           | 1.486 (0.646-3.42)   | 0.351          | 173.441    |
| Recessive                  | GG vs. AA+GA           | 1.667 (0.168-16.554) | 0.663          | 174.107    |

|                            |                        |                      |                |            |
|----------------------------|------------------------|----------------------|----------------|------------|
| Overdominant               | GA vs. AA+GG           | 1.427 (0.605-3.369)  | 0.417          | 173.645    |
| Additive                   | A                      | 1.419 (0.69-2.92)    | 0.341          | 173.417    |
| <b>STAT4 (rs10168266):</b> |                        |                      |                |            |
| <b>Model</b>               | <b>Genotype/Allele</b> | <b>OR (95% CI)</b>   | <b>p-value</b> | <b>AIC</b> |
| Codominant                 | CT vs. CC              | 0.412 (0.149-1.138)  | 0.087          | 172.871    |
|                            | TT vs. CC              | 1.010 (0.108-9.417)  | 0.993          |            |
| Dominant                   | CT+TT vs. CC           | 0.457 (0.177-1.179)  | 0.105          | 171.369    |
| Recessive                  | TT vs. CC+CT           | 1.424 (0.134-11.492) | 0.849          | 174.247    |
| Overdominant               | CT vs. CC+CT           | 0.412 (0.15-1.133)   | 0.086          | 170.871    |
| Additive                   | C                      | 0.552 (0.237-1.286)  | 0.169          | 172.156    |
| <b>Without MS</b>          |                        |                      |                |            |
| <b>STAT4 (rs10181656):</b> |                        |                      |                |            |
| <b>Model</b>               | <b>Genotype/Allele</b> | <b>OR (95% CI)</b>   | <b>p-value</b> | <b>AIC</b> |
| Codominant                 | CG vs. CC              | 0.836 (0.403-1.732)  | 0.629          | 209.195    |
|                            | GG vs. CC              | 0.692 (0.143-3.36)   | 0.648          |            |
| Dominant                   | CG+GG vs. CC           | 0.814 (0.405-1.637)  | 0.564          | 207.247    |
| Recessive                  | GG vs. CC+CG           | 0.740 (0.156-3.514)  | 0.705          | 207.430    |
| Overdominant               | CG vs. CC+GG           | 0.862 (0.42-1.768)   | 0.686          | 207.417    |
| Additive                   | C                      | 0.834 (0.468-1.468)  | 0.538          | 207.195    |
| <b>STAT4 (rs7574865):</b>  |                        |                      |                |            |
| <b>Model</b>               | <b>Genotype/Allele</b> | <b>OR (95% CI)</b>   | <b>p-value</b> | <b>AIC</b> |
| Codominant                 | GT vs. GG              | 0.910 (0.437-1.896)  | 0.801          | 209.517    |
|                            | TT vs. GG              | 0.993 (0.257-3.834)  | 0.992          |            |
| Dominant                   | GT+TT vs. GG           | 0.924 (0.462-1.845)  | 0.822          | 207.536    |
| Recessive                  | TT vs. GG+GT           | 1.028 (0.273-3.866)  | 0.967          | 207.581    |
| Overdominant               | GT vs. GG+TT           | 0.911 (0.443-1.87)   | 0.799          | 207.517    |
| Additive                   | G                      | 0.956 (0.552-1.665)  | 0.872          | 207.557    |
| <b>STAT4 (rs7601754):</b>  |                        |                      |                |            |
| <b>Model</b>               | <b>Genotype/Allele</b> | <b>OR (95% CI)</b>   | <b>p-value</b> | <b>AIC</b> |
| Codominant                 | GA vs. AA              | 1.148 (0.512-2.575)  | 0.738          | 209.434    |
|                            | GG vs. AA              | 1.301 (0.131-12.942) | 0.822          |            |
| Dominant                   | GA+GG vs. AA           | 1.160 (0.532-2.532)  | 0.709          | 207.445    |
| Recessive                  | GG vs. AA+GA           | 1.260 (0.128-12.434) | 0.843          | 207.545    |
| Overdominant               | GA vs. AA+GG           | 1.140(0.51-2.549)    | 0.750          | 207.483    |
| Additive                   | A                      | 1.146(0.577-2.275)   | 0.698          | 207.434    |
| <b>STAT4 (rs10168266):</b> |                        |                      |                |            |
| <b>Model</b>               | <b>Genotype/Allele</b> | <b>OR (95% CI)</b>   | <b>p-value</b> | <b>AIC</b> |
| Codominant                 | CT vs. CC              | 1.032 (0.491-2.17)   | 0.934          | 209.069    |
|                            | TT vs. CC              | 1.944 (0.338-11.181) | 0.456          |            |
| Dominant                   | CT+TT vs. CC           | 1.101 (0.54-2.244)   | 0.792          | 207.513    |
| Recessive                  | TT vs. CC+CT           | 1.925 (0.34-10.887)  | 0.459          | 207.075    |
| Overdominant               | CT vs. CC+CT           | 0.997 (0.478-2.082)  | 0.994          | 207.583    |
| Additive                   | C                      | 1.158 (0.628-2.14)   | 0.640          | 207.367    |

p-value – level of significance; differences were considered as statistically significant when  $p < 0.05$ , OR – capability ratio; AIC – Akaike.



**Table S9.** Haplotype association with the predisposition to optical neuritis with MS occurrence.

| Haplotype | <i>STAT4</i><br>rs10181656 | <i>STAT4</i><br>rs7574865 | <i>STAT4</i><br>rs7601754 | <i>STAT4</i><br>rs10168266 | Frequency |       | OR (95 % CI)       | p-value |
|-----------|----------------------------|---------------------------|---------------------------|----------------------------|-----------|-------|--------------------|---------|
|           |                            |                           |                           |                            | Control   | ON    |                    |         |
| 1         | C                          | G                         | A                         | C                          | 59.43     | 61.82 | 1.00               | —       |
| 2         | G                          | T                         | A                         | T                          | 14.57     | 10.06 | 0.61 (0.26 - 1.43) | 0.26    |
| 3         | C                          | G                         | G                         | C                          | 11.78     | 14.93 | 1.34 (0.63 – 2.81) | 0.45    |
| 4         | G                          | T                         | A                         | C                          | 9.16      | 3.41  | 0.46 (0.13 - 1.59) | 0.22    |
| 5         | C                          | G                         | A                         | T                          | 2.59      | -     | -                  | -       |

OR: odds ratio; CI: confidence interval; p-value: significance level (after Bonferroni correction statistically significant when  $p < 0.0125$ ).
